1 **Motor learning without movement**

2  
3 Olivia A. Kim<sup>1</sup>, Alexander D. Forrence<sup>2</sup>, and Samuel D. McDougle<sup>2,3</sup>

4  
5 *1. Department of Psychology, Princeton University, Princeton, NJ 08544*

6 *2. Department of Psychology, Yale University, New Haven, CT 06511*

7 *3. Interdepartmental Neuroscience Program, Wu Tsai Institute, Yale University, New Haven, CT 06511*

8  
9  
10  
11 Correspondence to:

12 Olivia Kim

13 oakim@princeton.edu

14 kim.olivia.a@gmail.com

15  
16  
17  
18 Number of Pages: 32

19 Number of Figures in Main Text: 3

20 Number of Supplemental Figures: 3

21 Number of Supplemental Tables: 3

22 References: 61 main text, 18 methods-only

23 Number of Words:

24 Abstract: 186

25 Introduction: 465

26 Results: 1,736

27 Main figure captions: 663

28 Discussion: 1,030

29  
30  
31  
32  
33 **AUTHOR CONTRIBUTIONS**

34 Conceptualization, OK, AF, & SM; Methodology, OK, AF, & SM; Software, AF & OK; Validation, OK & AF;

35 Formal Analysis, OK & AF; Investigation, OK & AF; Resources, OK & SM; Data Curation, OK & AF;

36 Supervision, SM; Project Administration, SM; Funding Acquisition, OK & SM; Writing – original draft, OK;

37 Writing – review & editing, OK, AF, & SM

38  
39  
40  
41  
42 **CONFLICT OF INTEREST**

43 The authors declare no competing financial interests.

44  
45  
46  
47  
48 **ACKNOWLEDGEMENTS**

49 This work was supported by a grant from the National Institutes of Health to OK (F32-NS122921).

50

51 **ABSTRACT**

52 Prediction errors guide many forms of learning, providing teaching signals that help us improve our  
53 performance. Implicit motor adaptation, for instance, is driven by sensory prediction errors (SPEs), which  
54 occur when the expected and observed consequences of a movement differ. Traditionally, SPE  
55 computation is thought to require movement execution. However, recent work suggesting that the brain  
56 generates and accounts for sensory predictions based on motor imagery or planning alone calls this  
57 assumption into question. Here, by measuring implicit adaptation during a visuomotor task, we tested  
58 whether motor planning and well-timed sensory feedback are sufficient for SPE computation. Human  
59 participants were cued to reach to a target and were, on a subset of trials, rapidly cued to withhold these  
60 movements. Errors displayed both on trials with and without movements induced single-trial implicit  
61 learning. Learning following trials without movements persisted even when movement trials had never been  
62 paired with errors, and when the direction of movement and sensory feedback trajectories were decoupled.  
63 These observations demonstrate that the brain can compute SPEs without generating overt movements,  
64 leading to the adaptation of planned movements even when they are not performed.

65

66 **SIGNIFICANCE STATEMENT**

67 We are always learning from our mistakes, because the brain is constantly generating predictions and  
68 monitoring the world for any surprises, which are also referred to as “prediction errors.” Whenever a  
69 prediction error occurs, the brain learns to update future predictions and be more accurate. Here, we  
70 demonstrate that the brain predicts the consequences of movements, computes prediction errors, and  
71 updates future movements, even if we subsequently decide to withhold the movement. Thus, the brain  
72 can learn to update movements that are not performed, representing a mechanism for learning based  
73 only on movement planning and sensory expectation. These findings also provide further support for the  
74 role of prediction in motor control.

75

76 **SIGNIFICANCE STATEMENT**

77 Our brains control aspects of our movement without our conscious awareness – allowing many of us to  
78 effortlessly pick up a glass of water or wave “hello.” Here, we demonstrate that this implicit motor system

79 can learn to refine movements that we plan but ultimately decide not to perform. Participants planned to  
80 reach to a target, and they sometimes withheld these reaches. When reaches were withheld, an  
81 animation simulating a reach that missed the target played. Afterwards, participants reached opposite the  
82 direction of the mistake without awareness of this change in their movements, indicating that the implicit  
83 motor system had learned from the animated mistake. These findings indicate that movement is not  
84 strictly necessary for motor adaptation, and that we can learn to update our actions based only on  
85 movement planning and observation of related events in the world.

86

87

88 **KEYWORDS**

89 predictive coding, forward model, mental imagery, supervised learning

90

91 **INTRODUCTION**

92 Prediction errors help to optimize behavior by driving learning processes that correct for our  
93 mistakes. Accordingly, their computation is thought to be a fundamental feature of the nervous system (1).  
94 Specific types of prediction errors are associated with dissociable learning processes, with sensory  
95 prediction errors (SPEs) serving as the teachers of the implicit motor system. SPEs are thought to trigger  
96 the adaptation and refinement of movements when the predicted and expected sensory outcomes of a  
97 movement differ (2–5). Traditional formulations assume that movement execution is critical for SPE  
98 computation (6, 7). However, current thinking posits that the forward model estimates the consequences of  
99 movements before the relevant sensory feedback reaches the brain, thereby overcoming intrinsic  
100 physiological delays in sensory signal conduction to the brain and allowing for the rapid motor control  
101 required by most vertebrates (8). Taking this principle to its logical conclusion indicates that motor execution  
102 should not be necessary for the generation of predictions by a forward model, because movements are  
103 synchronous with the sensory outcomes that must be predicted before we can plan the next stages of  
104 movement. In other words, the sensory consequences of intended movements ought to be predicted before  
105 those movements occur, and movement itself should not be necessary for this predictive process.

106 Recent work offers indirect support for the claim that the brain might predict the sensory  
107 consequences of movements before they can be performed, even when the agent does not have a clear  
108 intention to move (9–13). Considering that sensorimotor prediction should not in theory require movement,  
109 it may be that a prediction can be combined with an observation to support SPE computation without any  
110 actual motor execution. That is, SPEs should be effectively computed based upon only two events – the  
111 generation of a sensory prediction and the observation of sensory feedback (**Fig. 1a**).

112 Prior work has illustrated that higher-level cognitive processes support visuomotor learning without  
113 movement, for instance when observers witness others' motor errors: motor learning in this case might be  
114 driven by SPEs, or by other types of performance errors beyond SPE (e.g., reward prediction errors), or  
115 perhaps by a combination of multiple sources of error (14–16). Here, we isolated implicit motor adaptation  
116 to specifically test whether SPE computation requires movement execution, as SPEs are both necessary  
117 and sufficient for this form of learning (17–23). Having isolated implicit motor adaptation, we then asked

118 whether withheld movements could undergo adaptation following the observation of “simulated” sensory  
 119 feedback.

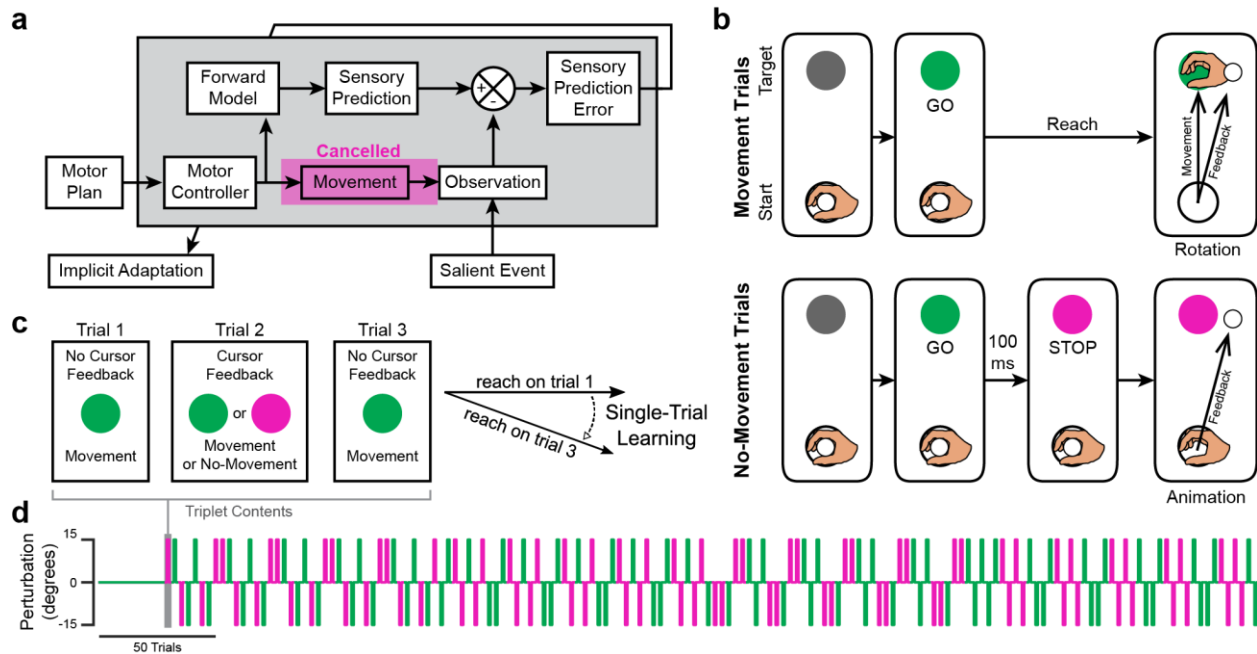

120

121 **Figure 1. Schematics showing the proposed learning framework and task design.** (a) Schematic  
 122 showing how the forward model may support implicit motor adaptation in the presence of sensory feedback  
 123 not causally related to self-generated movement. (b) Events on trials with visual feedback. The robotic  
 124 apparatus brought the participant’s hand to the starting location to initiate a trial. On Movement trials (top),  
 125 the target turned green (GO), cueing participants to reach through the target. On trials with visual feedback,  
 126 participants observed a white feedback cursor move along a rotated trajectory (Rotation). On No-Movement  
 127 trials (bottom), the target turned magenta 100 ms after turning green, cueing participants to withhold  
 128 movement (STOP). After a delay, an animation showing the feedback cursor moving 15° off-target played  
 129 (Animation). The hand is shown in the figure for illustrative purposes but was not visible during the  
 130 experiment. (c) How single-trial learning (STL) was computed using a triplet paradigm. Triplets were  
 131 composed of 2 Movement trials without visual feedback flanking either a Movement or a No-Movement trial  
 132 with visual feedback. STL was measured as the difference between reach angles on the flanking trials. (d)  
 133 The pseudorandomized order in which trials were presented for an example participant. Color indicates  
 134 movement condition (Movement: green, No-Movement: magenta).

135

136

137

138

139

140

To that end, we measured trial-by-trial implicit adaptation during a visuomotor task in which human participants saw visual feedback while performing – or withholding – hand and arm movements, using a modified stop-signal paradigm. To isolate implicit adaptation, we employed a recently-developed approach that requires participants to direct their movements directly for presented targets and disregard visual feedback (22, 24–28). We predicted that single-trial motor adaptation would occur following both typical movement trials that generated sensory error, as well as trials where movements were withheld but

141 simulated sensory errors were observed. If confirmed, this result would demonstrate that the brain can  
142 compute SPEs in the absence of movement and can thus drive the adaptation of planned movements that  
143 were never performed.

## 144 RESULTS

### 145 *Simulated and typical visuomotor rotations cause motor adaptation*

146 In our first experiment, we measured implicit motor adaptation in humans ( $n = 20$ ) performing or  
147 withholding straight reaches during a visuomotor adaptation task (**Fig. 1b**). Vision of the hand and arm was  
148 occluded by a mirror that reflected visual feedback from a horizontally mounted monitor. A white cursor  
149 provided feedback about participants' hand positions as they reached from a starting location to a displayed  
150 target. After a brief acclimation period, trials were organized into triplets, such that each trial with cursor  
151 feedback was flanked by trials without cursor feedback. This allowed for a reliable measurement of single-  
152 trial learning (STL) in response to feedback, quantified as the difference between the direction of hand  
153 movement (hand angle) on the first and third trials of each triplet (**Fig. 1c**). Trials with cursor feedback were  
154 either Movement trials on which a Go signal prompted movement or No-Movement trials on which a Stop  
155 signal immediately followed the Go signal, indicating that movements should be withheld. On Movement  
156 trials, feedback involved a visuomotor error ( $\pm 15^\circ$  rotation added to the visual cursor path; + = clockwise;  
157 **Fig. 1b right**). On No-Movement trials, sensory feedback involved a simulation of the cursor's path, using  
158 timing variables based on ongoing measurements of participant behavior (see *Methods*). All flanking trials  
159 of each triplet were Go trials and required movements. The direction of the error (clockwise [CW] or  
160 counterclockwise [CCW]) was pseudorandomly varied across triplets to maintain overall adaptation near 0  
161 throughout the session (**Fig. 1d**). This straightforward design allowed us to test the hypothesis that SPE  
162 computation and motor adaptation do not require that movement and sensory feedback to be causally  
163 linked (**Fig. 1a**).

164 Consistent with our predictions, rotated cursor paths on Movement and No-Movement trials both  
165 caused subsequent hand trajectories to shift opposite the direction of the rotation (**Fig. 2b-c**), with a 2-way  
166 repeated measures ANOVA revealing statistically significant main effects of the direction (CW vs CCW) of  
167 the perturbation applied ( $F(1, 19) = 98.62$ ,  $p = 5.89 \times 10^{-9}$ ,  $\eta_G^2 = 0.76$ ). While there was no significant main

168 effect of withholding movement ( $F(1, 19) = 1.79, p = 0.20$ ), we observed a significant interaction between  
 169 the perturbation applied and withholding movement ( $F(1, 19) = 137.32, p = 3.87 \times 10^{-10}, \eta_G^2 = 0.49$ ). Post-  
 170 hoc pairwise comparisons confirmed that STL was sensitive to perturbation direction during both Movement  
 171 (paired t-test:  $t(19) = 12.92, p_{adj} = 2.96 \times 10^{-10}, \text{Cohen's } d = 5.12$ ) and No-Movement triplets ( $t(19) = 4.39,$   
 172  $p_{adj} = 3.13 \times 10^{-4}, \text{Cohen's } d = 1.63$ ), and also indicated that STL magnitude was greater across Movement  
 173 than No-Movement triplets (paired-samples signed-rank test, CW rotations:  $V = 210, p_{adj} = 2.55 \times 10^{-6}, r =$   
 174  $0.88$ ; CCW rotations:  $t(19) = 9.43, p_{adj} = 2.70 \times 10^{-8}, \text{Cohen's } d = 2.02$ ) rotations. The overall amplitude of  
 175 adaptation observed both with and without movement was within the range of implicit learning rates  
 176 measured in previous studies (**Supplemental Fig. 1**).

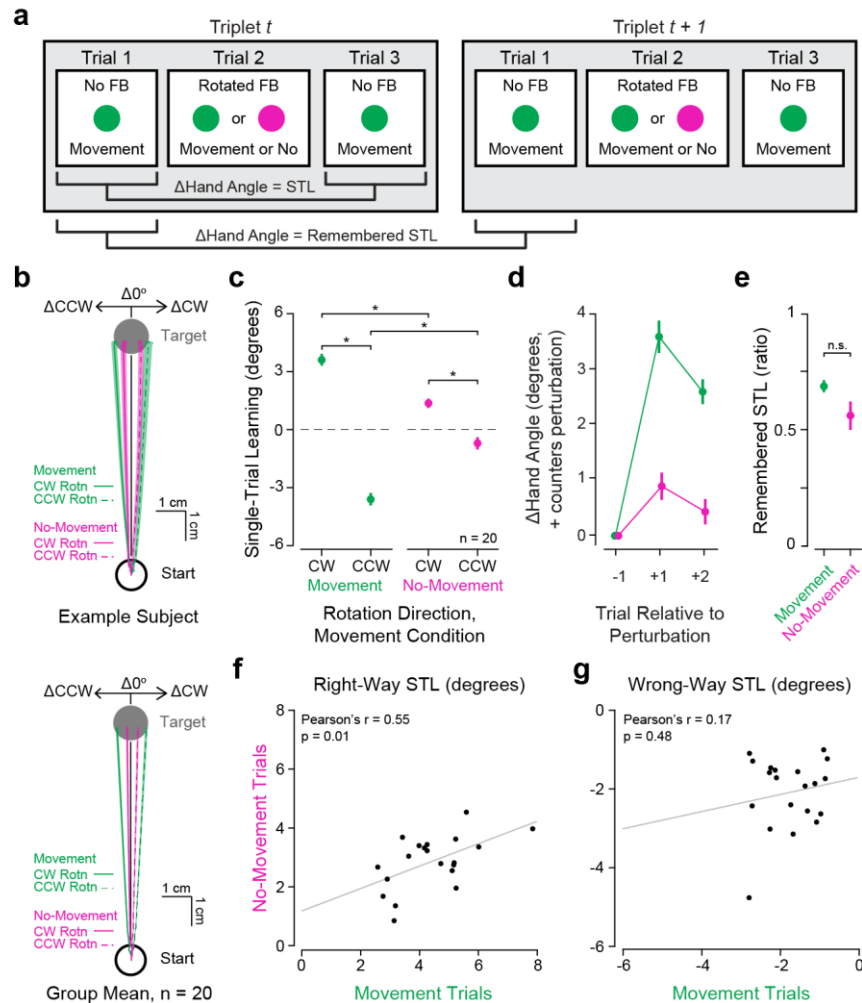

177

178 **Figure 2. Effects of typical and simulated errors during a visuomotor reach adaptation task. (A)**  
 179 **Schematic illustrating how STL and remembered STL measurements were computed. (B) An example**  
 180 **subject's (top) and the group's (bottom) mean  $\pm$  SEM changes in reach paths across triplets with a rotation**

181 applied (green: triplets with perturbations on Movement trials, magenta: triplets with perturbations on No-  
 182 Movement trials, solid lines: perturbation was a CW rotation, dashed lines: perturbation was a CCW  
 183 rotation). (C) STL across Movement (green) and No-Movement (magenta) triplets for all participants ( $n =$   
 184 20). Positive changes in hand angle are CCW. Refer to Supplemental Table 1 for details on all statistical  
 185 tests. (D) Group mean  $\pm$  SEM  $\Delta$ hand angle values after exposure to Movement (green) and No-Movement  
 186 (magenta) trial perturbations. Positive  $\Delta$  values indicate that the change in hand angle proceeded opposite  
 187 the direction of the perturbation (i.e., the direction that would counter the error, “Right-Way”). (E) Group  
 188 mean of participants’ ratios of remembered STL to initial STL during Movement and No-Movement trials.  
 189 (F) The relationship between Right-Way STL observed during Movement and No-Movement triplets. (G)  
 190 As in (F), but for STL observed on trials where adaptation proceeded in the direction that would exacerbate  
 191 the error (i.e., the same direction as the perturbation applied, “Wrong Way”). Statistical significance ( $* = p_{adj}$   
 192  $< 0.05$ ; n.s. =  $p_{adj} \geq 0.05$ ) is indicated. Abbreviations: STL – single-trial learning, CW – clockwise, CCW –  
 193 counterclockwise,  $\Delta$  – change in.

194

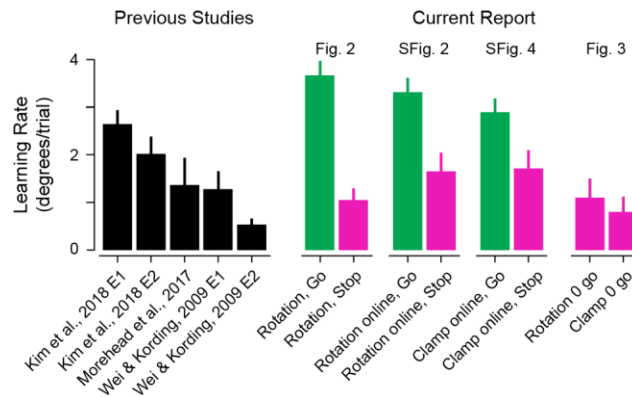

195

196 **Supplemental Figure 1. Learning rates reported in the literature and observed in the current study.**

197 Learning rates for motor adaptation observed in previous studies are shown at left in black, and learning  
 198 rates observed in each experiment in the current report are shown at the right, with data from Movement  
 199 triplets shown in green and data from No-Movement triplets shown in magenta. Data are shown as mean  
 200  $\pm$  SEM, and are shown for rotational/error clamp perturbations of 15°, with the exception of Wei & Kording,  
 201 2009 E2, where an 11° perturbation was applied. Papers referred to and their corresponding reference  
 202 numbers: Kim et al., 2018 (25); Morehead et al., 2017 (22); Wei & Kording, 2009 (29). “Rotation, Go” and  
 203 “Rotation, Stop” show data from the in-lab experiment where participants saw 15° rotated feedback on  
 204 Movement trials (i.e., data from Fig. 2), “Rotation online, Go” and “Rotation online, Stop” show data from  
 205 the online experiment where participants saw 0-15° rotated feedback on Movement trials (i.e., data from  
 206 Supplemental Fig. 2). “Clamp online, Go” and “Clamp online, Stop” show data from the online experiment  
 207 where participants saw 0-15° error-clamped feedback (i.e., data from Supplemental Fig., 4). “Rotation 0 go”  
 208 and “Clamp 0 go” show data from the online experiments where participants saw 0° perturbed feedback on  
 209 Movement trials. Abbreviations: E, experiment.

210

211 To address whether observed STL measured genuine implicit learning, we checked whether

212 adaptation persisted beyond the trial after an error was experienced. We examined participants’ hand

213 angles on the second trial after a perturbation relative to the pre-perturbation baseline trial (i.e., hand angle



214 on trial 1 of triplet  $t + 1$  relative to hand angle on trial 1 of triplet  $t$ , subsequently referred to as remembered  
215 STL, **Fig. 2a**). As visual feedback was withheld on both trial types, this approach provided a pure measure  
216 of persistent memory in the absence of error-driven changes in performance. Hand angle remained adapted  
217 in the direction opposite the rotation on trials with nonzero perturbations regardless of movement condition  
218 (**Fig. 2d**), suggesting that genuine implicit learning was observed in response to errors under both  
219 movement conditions. Closer examination of the relative ratio of remembered STL to initial STL revealed  
220 that retention of adaptation differed significantly from zero after both Movement ( $t(19) = 26.20$ ,  $p_{adj} = 6.71 \times$   
221  $10^{-16}$ , *Cohen's d* = 5.86) and No-Movement triplets ( $t(19) = 9.20$ ,  $p_{adj} = 2.98 \times 10^{-8}$ , *Cohen's d* = 2.06), and  
222 the amount of retention observed was not statistically significantly different between the movement  
223 conditions ( $t(19) = 2.07$ ,  $p_{adj} = 0.053$ , **Fig. 2e**).

224 To assess the potential similarity of mechanisms underlying adaptation after errors on Movement  
225 and No-Movement trials, we compared STL amplitude under each condition, reasoning that there should  
226 be a reliable relationship between the two measures if STL is supported by the same mechanism following  
227 both Movement and No-Movement trials. When we considered instances of STL in the direction that would  
228 compensate for the observed error (the direction opposite the rotation, i.e., the “Right-Way”), within-subject  
229 changes in hand angle were correlated between Movement and No-Movement trials (*Pearson's r* = 0.55,  $p$   
230 = 0.01; **Fig. 2f**). Conversely, changes in hand angle in the direction that would exacerbate the observed  
231 error (the direction of the rotation, i.e., the “Wrong-Way”) were uncorrelated between Movement and No-  
232 Movement trials (*Pearson's r* = 0.17,  $p$  = 0.48, **Fig. 2g**). Together, these observations suggest that the  
233 same learning process may underlie adaptive STL events in response to errors during both kinds of trials,  
234 while maladaptive changes in hand angle may be attributable to noise.

### 235 *Implicit motor adaptation proceeds after simulated errors in an online visuomotor task*

236 Illustrating that the above observations are reproducible and generalize across experimental  
237 contexts, we again observed that simulated errors in No-Movement trials also induced motor adaptation in  
238 an online, crowd-sourced version of the task. Participants ( $n = 40$ ) made hand movements using their  
239 computer mouse or trackpad to move a cursor towards a target. As in the experiment described above,  
240 trials were presented in triplets, allowing us to measure STL in response to cursor feedback presented

241 during Movement and No-Movement trials at the center of each triplet (**Fig. 1b-d**). For this online study,  
 242 triplets with 0° perturbations/simulated errors were also included to provide an estimate of baseline changes  
 243 in hand angle, in the event that participants exhibited strong movement biases in the online platform.

244 STL was directionally appropriate for the perturbation applied during both Movement and No-  
 245 Movement trials (**Supplemental Fig. 2a-c**, please refer to the supplemental material details of the statistical  
 246 analysis). Further echoing the results of the in-person study, STL on both Movement and No-Movement  
 247 trials was retained beyond the triplet in which the relevant error occurred (**Supplemental Fig. 2d-e**), and  
 248 the magnitude of STL in the direction that would counter the perturbation was again correlated across the  
 249 two movement conditions (**Supplemental Fig. 2e**). These data provide further support for the claim that  
 250 movements that are not performed can undergo implicit motor adaptation, and they extend our findings to  
 251 a task with different movement demands (e.g., finger or wrist movements versus full, center-out reaches).

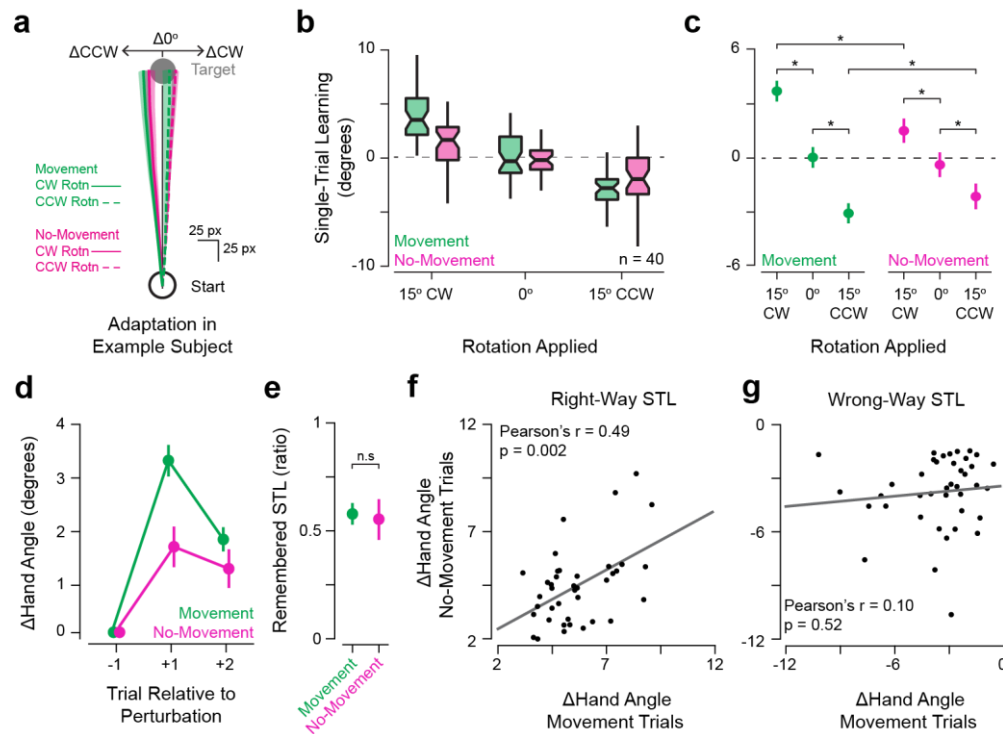

252

253 **Supplemental Figure 2. Single-trial learning in response to errors on Movement and No-Movement**  
 254 **trials during an online visuomotor adaptation task.** (a) An example participant's mean  $\pm$  SEM changes  
 255 in reach paths across triplets (green: triplets with perturbations on Movement trials, magenta: triplets with  
 256 perturbations on No-Movement trials, solid lines: perturbation was a CW rotation, dashed lines: perturbation  
 257 was a CCW rotation). (b) Boxplot showing STL across Movement (green) and No-Movement (magenta)  
 258 triplets for participants in an online version of the task described in Figure 1 ( $n = 40$ ). (c) Estimated marginal  
 259 means (EMMs)  $\pm$  95% confidence intervals from the linear mixed model (LMM) fit to participants' STL

260 performance (summarized in **b**). The LMM (fixed effects: rotation [15° counterclockwise {CCW}, 0°, and 15°  
261 clockwise {CW}], movement condition [Movement, No-Movement], rotation x movement condition  
262 interaction; random effects: participant) revealed significant main effects of rotated cursor feedback ( $F(2,$   
263  $2223) = 136.46$ ,  $p = 2.2 \times 10^{-16}$ ,  $partial R^2 = 0.11$ ) and movement condition ( $F(1, 2248) = 4.74$ ,  $p = 0.03$ ,  
264  $partial R^2 = 0.002$ ), as well as a significant interaction ( $F(2, 2229) = 12.40$ ,  $p = 4.41 \times 10^{-6}$ ,  $partial R^2 = 0.01$ ).  
265 Post-hoc pairwise comparisons of the EMMs from the model support the claim that rotated feedback  
266 induced a statistically significant degree of STL on both Movement (0° vs 15° CW:  $t(2227) = 9.14$ ,  $p_{adj} =$   
267  $6.39 \times 10^{-19}$ ,  $Cohen's d = 0.61$ ; 0° vs 15° CCW:  $t(2220) = 7.81$ ,  $p_{adj} = 2.61 \times 10^{-14}$ ,  $Cohen's d = 0.52$ ) and  
268 No-Movement trials (0° vs 15° CW:  $t(2225) = 3.92$ ,  $p_{adj} = 1.39 \times 10^{-4}$ ,  $Cohen's d = 0.31$ ; 0° vs 15° CCW:  
269  $t(2229) = 3.56$ ,  $p_{adj} = 4.84 \times 10^{-4}$ ,  $Cohen's d = 0.29$ ). Adaptation in the presence of a rotation was significantly  
270 greater in Movement trials than No-Movement trials for CW ( $t(2238) = 4.98$ ,  $p_{adj} = 1.26 \times 10^{-6}$ ,  $Cohen's d =$   
271  $0.37$ ) and CCW rotations ( $t(2239) = 2.06$ ,  $p_{adj} = 0.04$ ,  $Cohen's d = 0.15$ ). **(d)** Group mean  $\pm$  SEM change in  
272 ( $\Delta$ ) hand angle after exposure to Movement (green) and No-Movement (magenta) triplets' perturbations.  
273 Positive  $\Delta$  values indicate that the change in hand angle proceeded opposite the direction of the  
274 perturbation (*i.e.*, in the direction that would counter the error). **(e)** Group mean  $\pm$  SEM ratio of remembered  
275 STL to STL. Remembered STL was statistically significantly greater than 0 for both Movement (one-sample  
276 signed-rank test:  $V = 819$ ,  $p_{adj} = 1.09 \times 10^{-11}$ ,  $r = 0.87$ ) and No-Movement triplets ( $V = 769$ ,  $p_{adj} = 9.69 \times 10^{-8}$ ,  
277  $r = 0.76$ ), but remembered STL did not significantly differ between movement conditions (paired-samples  
278 signed-rank test:  $V = 441$ ,  $p_{adj} = 0.68$ ). **(f)** Scatter plot showing the relationship between individual subjects'  
279 STL amplitude in the direction opposite the rotation on Movement and No-Movement trials. When we  
280 considered instances of STL in the direction that would compensate for the observed error (update opposite  
281 rotation, "Right-Way"), within-subject changes in hand angle were correlated between Movement and No-  
282 Movement trials ( $Pearson's r = 0.49$ ,  $p_{adj} = 0.002$ ). **(g)** As in **f**, but showing data from trials with changes in  
283 hand angle in the direction that would exacerbate the observed error (update in direction of rotation,  
284 "Wrong-Way"). These  $\Delta$ Hand Angle values were uncorrelated between Movement and No-Movement trials  
285 ( $Pearson's r = 0.10$ ,  $p_{adj} = 0.52$ ). These observations support the idea that the same learning process may  
286 underlie adaptive single-trial learning events in response to errors on both kinds of trials, while maladaptive  
287 changes in hand angle may be attributable to potential sources of random noise. Boxplot centers: median,  
288 notch: 95% confidence interval of the median, box edges: 1<sup>st</sup> and 3<sup>rd</sup> quartiles, whiskers: most extreme  
289 value within 1.5\*interquartile range of the median. Statistical significance (\* =  $p < 0.05$ ; n.s. =  $p \geq 0.05$ ) is.  
290 Abbreviations: STL – single-trial learning,  $\Delta$  – change, CW – clockwise, CCW – counterclockwise.

291 *Motor adaptation during No-Movement triplets does not depend on participants' control over cursor*

292 *trajectory during Movement trials*

293 We note that rotated visual feedback on Movement trials was sensitive to people's actual reaching  
294 directions because the rotation was simply added to the measured reach direction, as is typical in  
295 visuomotor rotation tasks. It is possible that these directional contingencies affected participants' responses  
296 to error, potentially encouraging them to attempt to deliberately control the cursor's position via an explicit  
297 re-aiming process (23). To rule this out, we recruited a new group of participants ( $n = 37$ ) to perform a  
298 variant of the task where the visual cursor moved in a fixed path ("error-clamped" feedback (22);  
299 **Supplemental Fig. 3a**) in one of three directions (0° or 15° CW/CCW) on the trials with feedback.

300 Replicating and extending the findings reported above, participants assigned to the error-clamp  
 301 condition exhibited STL after Movement and No-Movement trials (**Supplemental Fig. 3b-d**; please refer to  
 302 supplemental material for details). We also observed significant retention of STL (**Supplemental Fig. 3e-f**)  
 303 and a significant correlation between STL amplitude on Movement and No-Movement trials where  
 304 adaptation proceeded opposite the direction of the perturbation (**Supplemental Fig. 3g-h**). These data  
 305 further strengthen the claim that motor adaptation does not require movement.

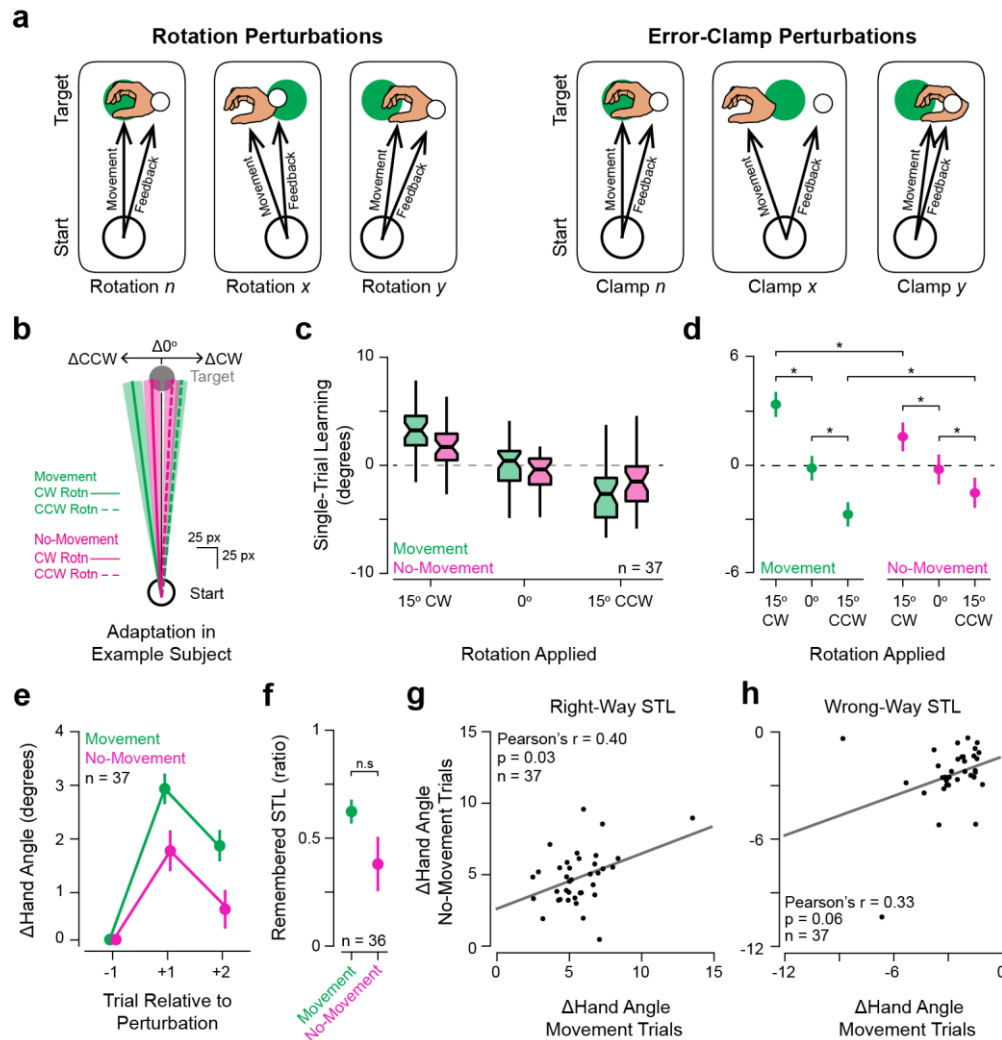

306

307 **Supplemental Figure 3. Single-trial learning in response to errors on Movement and No-Movement**  
 308 **trials with error-clamped feedback or simulated errors.** (a) Diagrams showing the relationship between  
 309 hand and cursor feedback movement directions under rotational (left) and error-clamp regimes (right).  
 310 When rotations are applied, the cursor's movement direction is contingent upon the participant's movement  
 311 direction. When error-clamp perturbations are applied, the cursor travels in a fixed direction, regardless of  
 312 the direction that the hand travels. As error-clamp perturbations render deliberate changes in movement  
 313 direction useless, they are often used in studies attempting to isolate implicit motor adaptation processes.

314 **(b)** An example participant's mean  $\pm$  SEM changes in reach paths across triplets (green: triplets with  
315 perturbations on Movement trials, magenta: triplets with perturbations on No-Movement trials, solid lines:  
316 perturbation was CW error-clamp, dashed lines: perturbation was CCW error-clamp). **(c)** Boxplot showing  
317 STL across Movement (green) and No-Movement (magenta) triplets for participants ( $n = 37$ ) in an online  
318 experiment where cursor feedback was error-clamped on Movement trials. **(d)** Estimated marginal means  
319 (EMMs)  $\pm$  95% confidence intervals from the linear mixed model (LMM) fit to participants' STL performance  
320 (summarized in **c**). The LMM (fixed effects: rotation [ $15^\circ$  counterclockwise {CCW},  $0^\circ$ , and  $15^\circ$  clockwise  
321 {CW}], movement condition [Movement, No-Movement], error-clamp  $\times$  movement condition interaction;  
322 random effects: participant) revealed significant main effects of error-clamped cursor feedback ( $F(2, 1829)$   
323  $= 79.46$ ,  $p = 2.2 \times 10^{-16}$ ,  $partial R^2 = 0.08$ ) and an interaction between error-clamp and movement condition  
324 ( $F(2, 1832) = 8.45$ ,  $p = 0.0002$ ,  $partial R^2 = 0.0003$ ), although there was no main effect of movement  
325 condition ( $F(1, 1844) = 0.60$ ,  $p = 0.44$ ). Post-hoc comparisons of the EMMs from the model revealed  
326 significant STL in response to non-zero error-clamped feedback on both Movement ( $0^\circ$  vs  $15^\circ$  CW:  $t(1827)$   
327  $= 7.55$ ,  $p_{adj} = 3.08 \times 10^{-13}$ ,  $Cohen's d = 0.56$ ;  $0^\circ$  vs  $15^\circ$  CCW:  $t(1828) = 5.57$ ,  $p_{adj} = 8.84 \times 10^{-8}$ ,  $Cohen's d$   
328  $= 0.41$ ) and No-Movement trials ( $0^\circ$  vs  $15^\circ$  CW:  $t(1830) = 3.21$ ,  $p_{adj} = 0.002$ ,  $Cohen's d = 0.29$ ;  $0^\circ$  vs  $15^\circ$   
329 CCW:  $t(1832) = 2.25$ ,  $p_{adj} = 0.03$ ,  $Cohen's d = 0.22$ ). Adaptation in the presence of a  $15^\circ$  error-clamp was  
330 significantly greater on Movement trials than No-Movement trials for CW ( $t(1846) = 3.49$ ,  $p_{adj} = 0.0009$ ,  
331  $Cohen's d = 0.29$ ) and CCW clamps ( $t(1846) = 2.29$ ,  $p_{adj} = 0.03$ ,  $Cohen's d = 0.19$ ). Please refer to  
332 Supplementary Table 2 for further details on post-hoc comparisons in this panel. **(e)** Group mean  $\pm$  SEM  
333 change in ( $\Delta$ ) hand angle one and two trials after exposure to Movement (green) and No-Movement  
334 (magenta) triplets' perturbations. Positive  $\Delta$  values indicate that the change in hand angle proceeded  
335 opposite the direction of the perturbation (*i.e.*, in the direction that would counter the error). **(f)** Remembered  
336 STL shown as the ratio of relative hand angle 2 trials after experiencing a perturbation to the relative hand  
337 angle 1 trial after the perturbation (STL). Remembered STL was significantly greater than 0 after both  
338 Movement (green; one-sample t-test:  $t(36) = 11.31$ ,  $p_{adj} = 6.23 \times 10^{-13}$ ,  $Cohen's d = 1.86$ ) and No-Movement  
339 triplets (magenta, one-sample signed-rank test:  $V = 579$ ,  $p_{adj} = 5.95 \times 10^{-5}$ ,  $r = 0.64$ ), but did not exhibit  
340 statistically significant differences between movement conditions (paired t-test:  $t(35) = 1.71$ ,  $p_{adj} = 0.09$ ).  
341 Remembered STL on No-Movement trials could not be computed for one participant, so  $n = 36$  instead of  
342 37 in this panel. **(g)** Scatter plot showing the relationship between individual subjects' STL amplitude in the  
343 direction opposite the error-clamp on Movement and No-Movement trials (*i.e.*, the "Right-Way"). Right-way  
344 changes in hand angle were correlated between Movement and No-Movement trials ( $Pearson's r = 0.40$ ,  
345  $p_{adj} = 0.03$ ). **(h)** As in **(g)**, but showing data from trials on which STL proceeded in the same direction as the  
346 error-clamp (*i.e.*, the "Wrong-Way"). Wrong-Way changes in hand angle were not statistically significantly  
347 correlated between Movement and No-Movement trials ( $r = 0.33$ ,  $p_{adj} = 0.06$ ). Boxplot centers: median,  
348 notch: 95% confidence interval of the median, box edges: 1<sup>st</sup> and 3<sup>rd</sup> quartiles, whiskers: most extreme  
349 value within 1.5\*interquartile range of the median. Statistical significance (\* =  $p < 0.05$ ; n.s. =  $p \geq 0.05$ ) is  
350 indicated for selected comparisons. Abbreviations: STL – single-trial learning,  $\Delta$  – change, CW – clockwise,  
351 CCW – counterclockwise.

352 *Adaptation during No-Movement triplets does not depend on within-session adaptation during Movement*  
353  *triplets*

354 In two further experiments, we asked if adaptation to errors in the No-Movement condition was  
355 contingent on sharing a context with the Movement condition. In other words, if learning in the No-  
356 Movement condition only occurs when there are neighboring trials in the Movement condition producing

357 typical SPEs, it is possible that adaptive responses observed in the No-Movement condition reflect a  
358 “cueing” effect, whereby an adapted sensorimotor map is cued by observation of the visual error and then  
359 retrieved on the subsequent trial(s) (30, 31). While our previous retention (**Fig. 2d-e, Supplemental Fig.**  
360 **2d-e, Supplemental Fig. 3e-f**) and correlation (**Fig. 2f-g, Supplemental Fig. 2f-g, Supplemental Fig. 3g-**  
361 **h**) results argue against this interpretation as they suggest a shared learning mechanism across movement  
362 conditions, we opted to directly test this alternative explanation in another pair of experiments. Here, we  
363 only included 0° rotated (**Fig. 3a**, left,  $n = 24$  participants) or clamped (**Fig. 3a**, right,  $n = 37$  participants)  
364 error feedback on Movement trials, but maintained 0° or 15° CW/CCW errors on the No-Movement trials.  
365 Thus, visual perturbations were never paired with movement. The key results were again replicated –  
366 learning was preserved in the No-Movement condition even when error feedback had never been  
367 associated with executed movements (**Fig. 3c**, rotation: LMM:  $F(557) = 23.01$ ,  $p = 2.07 \times 10^{-6}$ ,  $partial R^2 =$   
368  $0.04$ ; error-clamp:  $F(802) = 9.41$ ,  $p = 9.14 \times 10^{-5}$ ,  $partial R^2 = 0.02$ ). Post-hoc pairwise comparisons showed  
369 that adaptation was significantly different between triplets with clockwise and counterclockwise errors for  
370 both the rotation ( $t(557) = 4.80$ ,  $p = 2.07 \times 10^{-6}$ ,  $Cohen's d = 0.4$ ) and error-clamp experiments ( $t(1453) =$   
371  $4.32$ ,  $p = 5.34 \times 10^{-5}$ ,  $Cohen's d = 0.37$ ) – a hallmark of implicit motor adaptation (please refer to  
372 **Supplemental Table 3** for all post-hoc test results). Overall levels of STL observed on No-Movement trials  
373 were comparable during these two experiments to those discussed above, and within the range of learning  
374 rates previously observed in the literature (**Supplemental Fig. 1**). Furthermore, both groups of participants  
375 showed retention of STL that differed significantly from 0 (rotation, mean  $\pm$  SEM:  $0.53 \pm 0.06$  retention ratio,  
376 one-sample t-test:  $t(22) = 8.28$ ,  $p = 3.34 \times 10^{-8}$ ,  $Cohen's d = 1.73$ ; error-clamp, median: 0.45, interquartile-  
377 range: 0.58, one-sample signed-rank test:  $V = 507$ ,  $p = 0.001$ ,  $r = 0.53$ ). Overall, these experiments support  
378 the hypothesis that motor adaptation can proceed without movement execution.

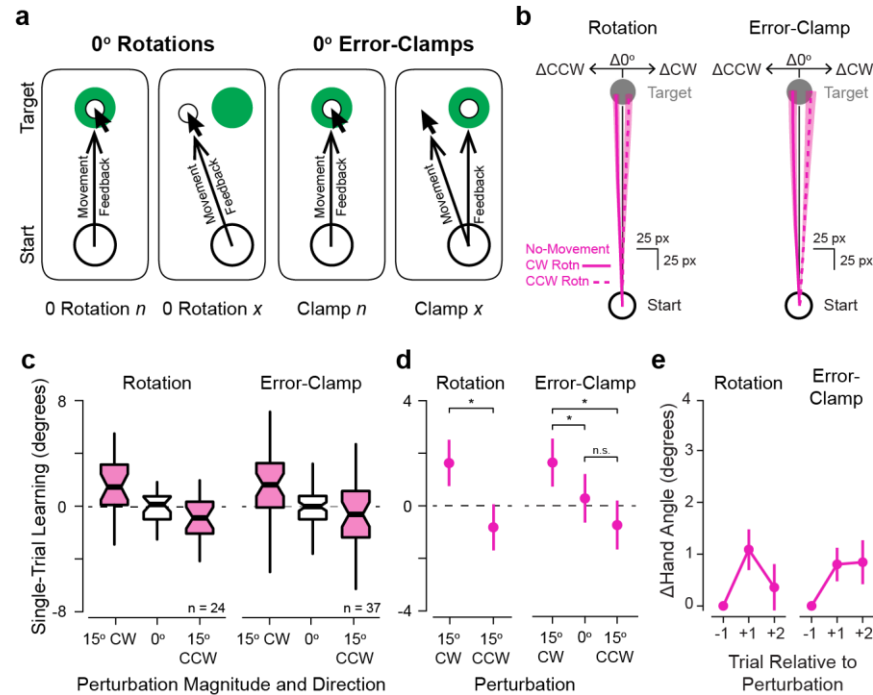

379

380 **Figure 3. Effects of simulated errors when perturbations were never applied during Movement trials.**  
 381 (a) Schematic illustrating the relationship between movement and visual feedback on Movement trials  
 382 during an experiment where visuomotor rotations (left) or error-clamps (right) were never applied during  
 383 Movement trials. (b) An example participant's mean  $\pm$  SEM changes in reach paths across No-Movement  
 384 triplets from studies in which non-zero rotations (left) and error-clamps (right) were never applied (solid  
 385 lines: perturbation was CW, dashed lines: perturbation was CCW). (c) Boxplots showing STL in response  
 386 to different directions of simulated errors (No-Movement triplets indicated in magenta) from rotation (left,  $n$   
 387 = 24) and error-clamp (right,  $n$  = 37) studies. (d) Estimated marginal means  $\pm$  95% confidence intervals  
 388 from the linear mixed models fit to each participant's STL performance summarized in (c). Asterisks indicate  
 389 statistically significant differences. (e) Mean  $\pm$  SEM relative hand angles on the two trials after a perturbation  
 390 was presented on a No-Movement trial. Please refer to Supplemental Table 3 for detailed statistical results.  
 391 Boxplot centers: median, notches: 95% confidence interval of the median, box edges: 1<sup>st</sup> and 3<sup>rd</sup> quartiles,  
 392 whiskers: most extreme values within 1.5\*IQR of the median. Statistical significance (\* =  $p_{adj} < 0.05$ ; n.s. =  
 393  $p_{adj} \geq 0.05$ ) is indicated for selected comparisons. Abbreviations: STL – single-trial learning, CW –  
 394 clockwise, CCW – counterclockwise,  $\Delta$  – change in.

## 395 DISCUSSION

396 Our results demonstrate that movements can be implicitly refined even when they are not  
 397 performed. Participants who were cued to reach towards a target but suppressed that movement after  
 398 observation of a Stop cue showed consistent, robust STL in response to simulated errors (**Figs. 2-3,**  
 399 **Supplemental Fig. 2, Supplemental Fig. 3**). As implicit learning necessarily proceeds following SPEs, our  
 400 data also provide evidence that SPEs are computed even when movements are not performed. These  
 401 findings strongly support the fundamental assumptions of predictive processing frameworks of motor

402 adaptation, where precise sensory predictions are generated from a movement intent (or “plan”, “goal”) and  
403 compared against sensory observations to induce error-based learning (8, 11, 13, 32, 33).

404 We argue that we have measured learning via an implicit process, and, by extension, that the STL  
405 observed in our study provides evidence that SPEs are computed regardless of whether a movement is  
406 performed. Although visuomotor tasks sometimes recruit cognitive strategies (e.g., deliberate “re-aiming”  
407 of movements), multiple factors indicate that our studies successfully measured implicit adaptation (23, 34,  
408 35). First, participants were instructed to ignore the displayed cursor and try to contact the target on every  
409 trial, a straightforward technique which has been consistently shown to eliminate the explicit re-aiming of  
410 movements (20, 22, 24–26, 28). Second, randomization of the presence and direction of errors discourages  
411 explicit learning, reducing motivation to apply ineffective re-aiming strategies (see (36)). Third, data from  
412 participants who did appear to not fully recall the instruction to always aim directly at the target were  
413 excluded (see *Methods*), decreasing the likelihood that strategic re-aiming contaminated the analysis.  
414 Fourth, adaptation persisted into subsequent no-feedback trials (**Fig. 2d-e, Fig. 3e, Supplemental Fig. 2d-**  
415 **e, Supplemental Fig. 3e-f**), consistent with lingering implicit motor learning; it is unlikely that strategies  
416 would be maintained through trials where no feedback is expected. Fifth, the magnitude of STL observed  
417 was generally consistent with multiple previous studies that similarly measured implicit motor adaptation  
418 rates (**Supplemental Fig. 1**) (22, 25, 37). Lastly, the adaptation effects observed in the No-Movement  
419 conditions were not attributable to the recall of learning that had occurred on Movement trials (**Fig. 3**). Our  
420 data thus provide converging evidence that movement is not required for implicit adaptation, and, by  
421 extension, SPE computation.

422 While motor planning and concurrent sensory observations are sufficient to drive SPE computation  
423 and motor adaptation, our data also indicate that participants showed significantly stronger STL over triplets  
424 with Movement trials versus No-Movement trials. This suggests that movement provides additional training  
425 input to the brain. Interestingly, this is consistent with patterns of cerebellar activity during motor behaviors,  
426 and current thinking about mechanisms for learning in cerebellar-dependent tasks like implicit reach  
427 adaptation (22). Purkinje cell complex spikes are a powerful teaching signal in the cerebellum, and these  
428 complex spikes exhibit firing patterns that may be movement-dependent (38–41). During target-directed  
429 reaching, complex spikes related to reach goal locations are generated *after* reach onset (42). If these



430 complex spikes are tied to motor performance and not motor planning, then the absence of these error  
431 signals on No-Movement trials may account for reduced levels of STL without movement (43–46). Another  
432 non-mutually exclusive possibility is that the precise timing of SPEs is less effective in our No-Movement  
433 condition than under normal movement conditions: in the former case, the timing of simulated feedback is  
434 controlled by the experimenter and not triggered by the subject's actual movement, potentially adding a  
435 novel source of noise into the adaptation process (47, 48). Irrespective of the fact that STL was of lesser  
436 amplitude across No-Movement than Movement triplets, our data demonstrate the significant influence of  
437 the brain's prediction signals on learning – even without the ability to directly attribute sensory feedback to  
438 an actual movement, prediction of a planned movement's sensory consequences supports the error  
439 computations that drive adaptation of future behavior.

440 Our findings add to a body of work indicating that many forms of motor learning do not strictly  
441 require movement-based practice. For instance, in (49), after human participants observed others adapting  
442 to a force field applied during reaching movements, the observers were able to partially compensate for  
443 that same force field when they encountered it themselves. Interestingly, this observational learning did not  
444 proceed if participants were executing other task-irrelevant movements during the observation period. This  
445 finding has been linked to subsequent neuroimaging data showing that observational learning recruits brain  
446 areas associated with motor planning, and together are taken to suggest that engagement in a covert motor  
447 planning process may allow for force-field adaptation via observation (49–51). Together, this related prior  
448 work and the evidence we have provided here suggest that there may be multiple routes to inducing motor  
449 planning and ultimately driving motor adaptation.

450 Other reports in the motor learning literature have provided evidence for cognitive compensation  
451 for observed motor errors during reaching, improved visual tracking following observation of target  
452 movement without engagement in visual pursuit, and improvement in movement speeds as a result of  
453 mental imagery training; this work highlights the breadth of motor performance-related processes that can  
454 be trained without engagement in physical movements (14, 15, 52, 53). Together with the findings related  
455 to motor adaptation via observation discussed above, the findings of the present report suggest that many  
456 features of motor performance can be improved by training regimens that do not involve movement. This  
457 points to a potential opportunity for the development of motor training or rehabilitation protocols that can be

458 used when people are unable to physically perform target motor behaviors, perhaps improving performance  
459 beyond what physical practice can do alone.

460 Finally, our results echo the fact that other types of learning can occur without overt task execution.  
461 As an example, fear associations can be extinguished by instructing participants to imagine a fear-  
462 predicting stimulus even when they are not presented with the stimulus, with this “imagination” protocol  
463 generating neural signatures of the negative prediction errors observed during naturalistic fear extinction  
464 (54, 55). Considering both this prior work and the findings presented in this study, it may be that the  
465 generation of predictions for comparison with sensory observations is sufficient for error-based learning  
466 across motor and non-motor domains alike. In other words, task execution may not always be required for  
467 learning, so long as the predictions and observations needed to compute errors are both present.

468 **REFERENCES**

- 469 1. K. Friston, The free-energy principle: a unified brain theory? *Nat Rev Neurosci* **11**, 127–138 (2010).
- 470 2. D. M. Wolpert, R. C. Miall, M. Kawato, Internal models in the cerebellum. *Trends in Cognitive*  
471 *Sciences* **2**, 338–347 (1998).
- 472 3. R. C. Miall, D. J. Weir, D. M. Wolpert, J. F. Stein, Is the Cerebellum a Smith Predictor? *Journal of*  
473 *Motor Behavior* **25**, 203–216 (1993).
- 474 4. L. S. Popa, T. J. Ebner, Cerebellum, Predictions and Errors. *Frontiers in Cellular Neuroscience* **12**  
475 (2019).
- 476 5. D. M. Wolpert, J. R. Flanagan, Motor prediction. *Current Biology* **11**, R729–R732 (2001).
- 477 6. R. Shadmehr, M. A. Smith, J. W. Krakauer, Error Correction, Sensory Prediction, and Adaptation in  
478 Motor Control. *Annu. Rev. Neurosci.* **33**, 89–108 (2010).
- 479 7. R. Held, S. J. Freedman, Plasticity in Human Sensorimotor Control. *Science* **142**, 455–462 (1963).
- 480 8. R. C. Miall, D. M. Wolpert, Forward Models for Physiological Motor Control. *Neural Networks* **9**,  
481 1265–1279 (1996).
- 482 9. K. Kilteni, B. J. Andersson, C. Houborg, H. H. Ehrsson, Motor imagery involves predicting the  
483 sensory consequences of the imagined movement. *Nat Commun* **9**, 1617 (2018).
- 484 10. M. Voss, J. N. Ingram, P. Haggard, D. M. Wolpert, Sensorimotor attenuation by central motor  
485 command signals in the absence of movement. *Nat Neurosci* **9**, 26–27 (2006).
- 486 11. H. R. Sheahan, D. W. Franklin, D. M. Wolpert, Motor Planning, Not Execution, Separates Motor  
487 Memories. *Neuron* **92**, 773–779 (2016).
- 488 12. H. R. Sheahan, J. N. Ingram, G. M. Žalalytė, D. M. Wolpert, Imagery of movements immediately  
489 following performance allows learning of motor skills that interfere. *Sci Rep* **8**, 14330 (2018).
- 490 13. I. S. Howard, D. M. Wolpert, D. W. Franklin, The Value of the Follow-Through Derives from Motor  
491 Learning Depending on Future Actions. *Current Biology* **25**, 397–401 (2015).
- 492 14. N. T. Ong, N. J. Hodges, Absence of after-effects for observers after watching a visuomotor  
493 adaptation. *Exp Brain Res* **205**, 325–334 (2010).
- 494 15. S. B. Lim, B. C. Larssen, N. J. Hodges, Manipulating visual–motor experience to probe for  
495 observation-induced after-effects in adaptation learning. *Exp Brain Res* **232**, 789–802 (2014).
- 496 16. J. A. Taylor, R. B. Ivry, Flexible Cognitive Strategies during Motor Learning. *PLOS Computational*  
497 *Biology* **7**, e1001096 (2011).
- 498 17. Y. Tseng, J. Diedrichsen, J. W. Krakauer, R. Shadmehr, A. J. Bastian, Sensory Prediction Errors  
499 Drive Cerebellum-Dependent Adaptation of Reaching. *Journal of Neurophysiology* **98**, 54–62  
500 (2007).
- 501 18. P. A. Butcher, J. A. Taylor, Decomposition of a sensory prediction error signal for visuomotor  
502 adaptation. *Journal of Experimental Psychology: Human Perception and Performance* **44**, 176–194  
503 (2018).

- 504 19. J. S. Tsay, A. M. Haith, R. B. Ivry, H. E. Kim, “Interactions between sensory prediction error and  
505 task error during implicit motor learning” (2021).
- 506 20. S. D. McDougle, R. B. Ivry, J. A. Taylor, Taking Aim at the Cognitive Side of Learning in  
507 Sensorimotor Adaptation Tasks. *Trends in Cognitive Sciences* **20**, 535–544 (2016).
- 508 21. P. Mazzoni, J. W. Krakauer, An Implicit Plan Overrides an Explicit Strategy during Visuomotor  
509 Adaptation. *J. Neurosci.* **26**, 3642–3645 (2006).
- 510 22. J. R. Morehead, J. A. Taylor, D. E. Parvin, R. B. Ivry, Characteristics of Implicit Sensorimotor  
511 Adaptation Revealed by Task-irrelevant Clamped Feedback. *J Cogn Neurosci* **29**, 1061–1074  
512 (2017).
- 513 23. J. A. Taylor, J. W. Krakauer, R. B. Ivry, Explicit and Implicit Contributions to Learning in a  
514 Sensorimotor Adaptation Task | Journal of Neuroscience. *The Journal of Neuroscience* **34** (2014).
- 515 24. J. S. Tsay, D. E. Parvin, R. B. Ivry, Continuous reports of sensed hand position during sensorimotor  
516 adaptation. *Journal of Neurophysiology* **124**, 1122–1130 (2020).
- 517 25. H. E. Kim, J. R. Morehead, D. E. Parvin, R. Moazzezi, R. B. Ivry, Invariant errors reveal limitations  
518 in motor correction rather than constraints on error sensitivity. *Communications Biology* **1**, 1–7  
519 (2018).
- 520 26. G. Avraham, J. R. Morehead, H. E. Kim, R. B. Ivry, Reexposure to a sensorimotor perturbation  
521 produces opposite effects on explicit and implicit learning processes. *PLOS Biology* **19**, e3001147  
522 (2021).
- 523 27. E. Poh, N. Al-Fawakari, R. Tam, J. A. Taylor, S. D. McDougle, Generalization of motor learning in  
524 psychological space. *bioRxiv*, 2021.02.09.430542 (2021).
- 525 28. A. M. Hadjiosif, J. W. Krakauer, A. M. Haith, Did We Get Sensorimotor Adaptation Wrong? Implicit  
526 Adaptation as Direct Policy Updating Rather than Forward-Model-Based Learning. *J. Neurosci.* **41**,  
527 2747–2761 (2021).
- 528 29. K. Wei, K. Körding, Relevance of Error: What Drives Motor Adaptation? *Journal of Neurophysiology*  
529 **101**, 655–664 (2009).
- 530 30. S. Pollmann, M. Maertens, Shift of activity from attention to motor-related brain areas during visual  
531 learning. *Nat Neurosci* **8**, 1494–1496 (2005).
- 532 31. B. Hommel, Event Files: Evidence for Automatic Integration of Stimulus-Response Episodes. *Visual*  
533 *Cognition* **5**, 183–216 (1998).
- 534 32. A. L. Wong, M. Shelhamer, Sensorimotor adaptation error signals are derived from realistic  
535 predictions of movement outcomes. *Journal of Neurophysiology* **105**, 1130–1140 (2011).
- 536 33. D. W. Franklin, D. M. Wolpert, Computational Mechanisms of Sensorimotor Control. *Neuron* **72**,  
537 425–442 (2011).
- 538 34. J. Krakauer W., A. Hadjiosif, J. Xu, A. Wong L., “Motor Learning” in *Comprehensive Physiology*, 1st  
539 Ed., R. Terjung, Ed. (Wiley, 2019) <https://doi.org/10.1002/cphy> (August 3, 2021).
- 540 35. S. D. McDougle, J. A. Taylor, Dissociable cognitive strategies for sensorimotor learning. *Nat*  
541 *Commun* **10**, 40 (2019).

- 542 36. S. A. Hutter, J. A. Taylor, Relative sensitivity of explicit reaiming and implicit motor adaptation.  
543 *Journal of Neurophysiology* **120**, 2640–2648 (2018).
- 544 37. K. Wei, K. Koerding, Uncertainty of feedback and state estimation determines the speed of motor  
545 adaptation. *Front. Comput. Neurosci.* (2010) <https://doi.org/10.3389/fncom.2010.00011> (August 3,  
546 2021).
- 547 38. S. G. Lisberger, The Rules of Cerebellar Learning: Around the Ito Hypothesis. *Neuroscience* **462**,  
548 175–190 (2021).
- 549 39. M. Ito, Mechanisms of motor learning in the cerebellum. *Brain Research* **886**, 237–245 (2000).
- 550 40. C. I. De Zeeuw, S. G. Lisberger, J. L. Raymond, Diversity and dynamism in the cerebellum. *Nat*  
551 *Neurosci* **24**, 160–167 (2021).
- 552 41. M. D. Mauk, J. F. Medina, W. L. Nores, T. Ohyama, Cerebellar function: Coordination, learning or  
553 timing? *Current Biology* **10**, R522–R525 (2000).
- 554 42. S. Kitazawa, T. Kimura, P.-B. Yin, Cerebellar complex spikes encode both destinations and errors in  
555 arm movements. *Nature* **392**, 494–497 (1998).
- 556 43. M. M. ten Brinke, *et al.*, Evolving Models of Pavlovian Conditioning: Cerebellar Cortical Dynamics in  
557 Awake Behaving Mice. *Cell Reports* **13**, 1977–1988 (2015).
- 558 44. S. Ohmae, J. F. Medina, Climbing fibers encode a temporal-difference prediction error during  
559 cerebellar learning in mice. *Nat Neurosci* **18**, 1798–1803 (2015).
- 560 45. R. R. Llinás, Inferior olive oscillation as the temporal basis for motricity and oscillatory reset as the  
561 basis for motor error correction. *Neuroscience* **162**, 797–804 (2009).
- 562 46. V. Romano, *et al.*, Olivocerebellar control of movement symmetry. *Current Biology* **0** (2022).
- 563 47. S. N. Brudner, N. Kethidi, D. Graeupner, R. B. Ivry, J. A. Taylor, Delayed feedback during  
564 sensorimotor learning selectively disrupts adaptation but not strategy use. *Journal of*  
565 *Neurophysiology* **115**, 1499–1511 (2016).
- 566 48. A. Suvrathan, H. L. Payne, J. L. Raymond, Timing Rules for Synaptic Plasticity Matched to  
567 Behavioral Function. *Neuron* **92**, 959–967 (2016).
- 568 49. A. A. G. Mattar, P. L. Gribble, Motor Learning by Observing. *Neuron* **46**, 153–160 (2005).
- 569 50. N. Malfait, *et al.*, fMRI Activation during Observation of Others' Reach Errors. *Journal of Cognitive*  
570 *Neuroscience* **22**, 1493–1503 (2010).
- 571 51. H. R. McGregor, P. L. Gribble, Functional connectivity between somatosensory and motor brain  
572 areas predicts individual differences in motor learning by observing. *Journal of Neurophysiology*  
573 **118**, 1235–1243 (2017).
- 574 52. R. Gentili, C. E. Han, N. Schweighofer, C. Papaxanthis, Motor Learning Without Doing: Trial-by-Trial  
575 Improvement in Motor Performance During Mental Training. *Journal of Neurophysiology* **104** (2010).
- 576 53. M. Cain, Y. Botschko, M. Joshua, Passive Motor Learning: Oculomotor Adaptation in the Absence  
577 of Behavioral Errors. *eNeuro* **8** (2021).

- 578 54. A. Mendelsohn, A. Pine, D. Schiller, Between Thoughts and Actions: Motivationally Salient Cues  
579 Invigorate Mental Action in the Human Brain. *Neuron* **81**, 207–217 (2014).
- 580 55. M. C. Reddan, T. D. Wager, D. Schiller, Attenuating Neural Threat Expression with Imagination.  
581 *Neuron* **100**, 994-1005.e4 (2018).
- 582 56. D. J. Herzfeld, P. A. Vaswani, M. K. Marko, R. Shadmehr, A memory of errors in sensorimotor  
583 learning. *Science* **345**, 1349–1353 (2014).
- 584 57. R. J. van Beers, Motor Learning Is Optimally Tuned to the Properties of Motor Noise. *Neuron* **63**,  
585 406–417 (2009).
- 586 58. H. G. Wu, Y. R. Miyamoto, L. N. G. Castro, B. P. Ölveczky, M. A. Smith, Temporal structure of  
587 motor variability is dynamically regulated and predicts motor learning ability. *Nat Neurosci* **17**, 312–  
588 321 (2014).
- 589 59. Photon Storm, Phaser (V. 3.24.1) (2020).
- 590 60. J. S. Tsay, R. B. Ivry, A. Lee, G. Avraham, Moving outside the lab: The viability of conducting  
591 sensorimotor learning studies online. *NBDT*, 1–22 (2021).
- 592 61. A. Kassambara, *rstatix: Pipe-Friendly Framework for Basic Statistical Tests* (2021) (December 22,  
593 2021).
- 594 62. T. Hothorn, K. Hornik, M. A. van de Wiel, A. Zeileis, Implementing a Class of Permutation Tests:  
595 The coin Package. *Journal of Statistical Software* **28**, 1–23 (2008).
- 596 63. K. Bartoń, *MuMIn: Multi-Model Inference* (2020) (December 22, 2021).
- 597 64. A. Kuznetsova, P. B. Brockhoff, R. H. B. Christensen, lmerTest Package: Tests in Linear Mixed  
598 Effects Models. *Journal of Statistical Software* **82**, 1–26 (2017).
- 599 65. D. Bates, M. Mächler, B. Bolker, S. Walker, Fitting Linear Mixed-Effects Models using lme4.  
600 *arXiv:1406.5823 [stat]* (2014) (December 22, 2021).
- 601 66. B. Jaeger, *r2glmm: Computes R Squared for Mixed (Multilevel) Models* (2017) (December 22,  
602 2021).
- 603 67. R. V. Lenth, *emmeans: Estimated Marginal Means, aka Least-Squares Means* (2021) (December  
604 22, 2021).
- 605 68. M. Torchiano, *effsize: Efficient Effect Size Computation* (2020) (December 22, 2021).
- 606 69. M. Ben-Shachar, D. Lüdtke, D. Makowski, effectsize: Estimation of Effect Size Indices and  
607 Standardized Parameters. *Journal of Open Source Software* **5**, 7 (2020).
- 608 70. S. M. Bache, H. Wickham, RStudio, *magrittr: A Forward-Pipe Operator for R* (2020) (December 22,  
609 2021).
- 610 71. H. Wickham, *ggplot2: Elegant Graphics for Data Analysis* (Springer-Verlag, 2016).
- 611 72. A. Kassambara, *ggpubr: “ggplot2” Based Publication Ready Plots* (2020) (December 22, 2021).
- 612 73. D. Lüdtke, ggeffects: Tidy Data Frames of Marginal Effects from Regression Models. *JOSS* **3**, 772  
613 (2018).



615 **METHODS**

616 *Participants.* Participants ( $n = 233$ , aged 18-35, 126 female) recruited from the research participation pools  
617 at Princeton/Yale University and on Prolific provided informed consent, approved by each University's IRB.  
618 Seventy-five participants were excluded (10 from the dataset collected for Supplemental Fig. 2, 13 from the  
619 dataset collected for Supplemental Fig. 3, 26 from the dataset collected for the rotation perturbation  
620 experiments described in Fig. 3, and 26 from the dataset collected for the error-clamp perturbation  
621 experiments described in Fig. 3) for failure to sufficiently recall task instructions, as ascertained by a  
622 questionnaire at the end of the experiment, leaving 158 participants for our analyses. See the *Questionnaire*  
623 section below the *Test phase* sections for more details. We note that all the key results described here (*i.e.*,  
624 statistically significant learning after No-Movement trials) held with or without these exclusions; we opted to  
625 be conservative in our exclusion criteria to limit potential effects of explicit learning. We note that the  
626 samples used for the online experiments described in the text are around twice the size of similar studies  
627 in the literature, providing additional statistical power to compensate for the experiment being conducted  
628 remotely.(56–58)

629  
630 *Task Setup: In Lab.* Participants were seated in a chair and made ballistic reaching movements while  
631 grasping the handle of a robotic manipulandum with their dominant hand (Kinarm End-Point). The  
632 manipulandum restricted movements to the horizontal plane. All visual stimuli were projected to the  
633 participant via a horizontal display screen (60 Hz) reflected onto a semi-silvered mirror mounted above the  
634 robotic handle. The mirror occluded vision of the arm, hand, and robotic handle, preventing direct visual  
635 feedback of hand position. Tasks were programmed in Matlab 2019a's Simulink for deployment in Kinarm's  
636 Dexter-E software (version 3.9). Movement kinematics were recorded at 1 kHz. Each participant viewed  
637 a single target located at either 45°, 135°, 225°, or 315° (with target position counterbalanced across  
638 participants), 8 cm from a central starting location. The target was visible throughout the experiment.

639  
640 *Task Setup: Online.* Experiments were conducted remotely using a custom JavaScript web application  
641 based on Phaser 3.24 (download available at (59)), similar to an approach previously described.(60) Each  
642 participant viewed a single target located at either 45°, 135°, 225°, or 315° (with target position



643 counterbalanced across participants), 250 pixels from a central starting location. The target was visible  
644 throughout the experiment.

645 Participants used an input device of their choice to control their computer cursor during center-out  
646 movements. One participant reported using a touchscreen device and was excluded from all analyses. The  
647 remaining participants reported using either a trackpad ( $n = 112$ ), an optical mouse ( $n = 86$ ), or a trackball  
648 ( $n = 14$ ). A linear mixed model (LMM) did not show effects of Mouse Type on single-trial learning (STL),  
649 although we observed that participants using a trackpad exhibited longer reaction times than others,  
650 consistent with a previous report.<sup>(60)</sup>

651 Mouse position sampling rates depended on the exact hardware that each participant used to  
652 complete the task. Sampling rates were likely affected by features of the specific mouse used, along with  
653 features of the specific computer used, as computers may limit the rate at which the browser samples data  
654 in order to cope with limited processing power. In general, sampling rates were around 60 Hz (median  $\pm$   
655 interquartile range across all 213 online participants recruited:  $62.46 \pm 2.17$  Hz) but ranged from 19.23 Hz  
656 to 249.69 Hz. Note that the vast majority of sampling rates were near 60 Hz: Only 5% of sampling rates  
657 were  $< 41.79$  Hz, and only 5% of sampling rates were  $> 126.65$  Hz.

658

659 *Baseline training phase.* For in-lab participants, the robot moved the participant's hand to a central starting  
660 location (depicted by a grey circle) at the middle of the display while hand and cursor feedback were hidden.  
661 They were instructed to hold their hand still in the starting location until the target turned green, at which  
662 point they should make a straight slicing movement through the target. After a 100 ms delay, the robot  
663 moved the hand back to the starting location. Participants completed 5 of these trials with online and  
664 endpoint cursor feedback, followed by 5 trials without visual feedback of the cursor location. Endpoint  
665 feedback was constituted by the cursor remaining at the position where it had passed the target radius for  
666 50 ms. Participants then completed 10 alternating trials on which the target turned green and stayed green  
667 (Execution, 'Go' trials) and on which the target turned magenta 100 ms after turning green, signaling that  
668 participants should withhold their movement (No-Movement, 'Stop' trials). After this baseline phase,  
669 participants were instructed to continue following these instructions for the remainder of the experiment.

670 Online participants experienced an identical baseline phase, with the exception that they were  
671 instructed to move their mouse into a central starting location on the first trial and subsequently saw their  
672 mouse cursor reappear near the starting location 100 ms after the completion of the reaching movement,  
673 so that participants could quickly return to the start location to initiate the next trial.

674

675 *Test phase: Rotation and Error-Clamp Experiments (Fig. 2, Supplemental Fig. 2, Supplemental Fig. 3).*

676 During the test phase, 480 (in-lab) or 270 (online) total trials were divided into 3-trial triplets (**Fig. 1C**). The  
677 first and last trials of all triplets were Go trials, and participants received neither online nor endpoint feedback  
678 about cursor location on these trials. The second trial of each triplet was either a Movement or a No-  
679 Movement trial. On Movement trials, participants either received rotated/error-clamped(22) visual feedback  
680 ( $15^\circ$  clockwise [-, CW] or counterclockwise [+ , CCW], with sign randomized across trials) or veridical/ $0^\circ$   
681 error-clamped visual feedback of their cursor location. On No-Movement (Stop) perturbation trials,  
682 participants viewed a brief animation of the cursor moving straight to the center of the target following a  
683 trajectory deflected by  $\pm 15^\circ$  from the target center. Animation onset latency was set as a running median  
684 of the participant's reaction times on the previous 5 trials, and animation duration was set as a running  
685 median of the participant's movement times on the previous 5 trials. If a participant took longer than 400  
686 ms to execute a movement, 800 ms to initiate the movement, their reach trajectory changed by  $>10^\circ$  during  
687 the movement, or the reach terminated  $\geq 60^\circ$  away from the target, they received a warning and a 4s time-  
688 out. If a participant moved their hand ( $>5$  mm in-lab [radius of the starting location]; anything  $>0$  pixels  
689 online) on a No-Movement trial, the trial was immediately aborted, and they received a warning and a 4s  
690 time-out. The Stop manipulation was successful: Across the experiments, participants erroneously moved  
691 on  $34.39 \pm 20.63\%$  (mean  $\pm$  standard deviation) of Stop trials, suggesting that, for the most part, they were  
692 consistently planning movements on Stop trials.

693 For in-lab studies, we used 4 possible triplet perturbation trial types (Movement/No-Movement:  
694  $\pm 15^\circ$ ), each of which occurred 40 times throughout each session. For online studies, we used 6 possible  
695 triplet perturbation trial types (Movement/No-Movement:  $\pm 15^\circ$  or  $0^\circ$ ), each of which occurred 15 times  
696 throughout each session. Triplets were pseudorandomly presented within each block, with the constraints  
697 that a single rotation ( $\pm 15^\circ$  or  $0^\circ$ ) could not occur on more than 2 consecutive triplets and that the same

698 movement condition (i.e., Movement or No-Movement) could not occur on more than 3 consecutive triplets.  
699 Three repetitions of each triplet type occurred in blocks of 18 triplets, and participants received a break after  
700 each of these blocks.

701  
702 *Test phase: Rotation and Error-Clamp Experiments with 0° Perturbations on Movement Trials (Fig. 3).*  
703 Experiments were conducted as described above for the other online experiments, with the exception of  
704 the details described in this section. For the experiments described in **Fig. 3A-D**, we used a reduced set of  
705 3 possible triplet Perturbation trial types (No-Movement, 15° clockwise error; No-Movement, 15°  
706 counterclockwise error; Movement, 0° rotation). We maintained an equal number of Movement and No-  
707 Movement triplets throughout the session in order to ensure that participants would reliably respond to the  
708 “Go” cue presented at the start of each trial. So, each No-Movement triplet type occurred 22 times, while  
709 the Movement triplet type occurred 44 times. Triplets were pseudorandomly presented within each block,  
710 with the constraints that a single non-zero rotation (15° clockwise, 15° counterclockwise) could not occur  
711 on more than 2 consecutive triplets.

712 For the experiments described in **Fig. 3E-H**, we used a set of 4 possible triplet Perturbation trial  
713 types (No-Movement, 15° clockwise error; No-Movement, 15° counterclockwise error; No-Movement, 0°  
714 error; Movement, 0° error-clamp). To maintain an equal number of Movement and No-Movement triplets  
715 throughout the session, each No-Movement triplet type occurred 15 times and the Movement triplet type  
716 occurred 45 times.

717  
718 *Questionnaire:* As we could not receive verbal confirmation that participants understood the task  
719 instructions in the online version of the task, we asked subjects to fill out a brief questionnaire to query their  
720 understanding of the task. The questionnaire asked participants to attest whether or not 1) their goal was  
721 to move the real mouse and not the cursor straight through the green targets and whether or not 2) their  
722 goal was to move the white cursor (not the real mouse) straight through the green targets. Participants  
723 could select the options, “True,” “False,” or “Not Sure.” Participants were considered to have understood  
724 the instructions if they answered both questions correctly (i.e., answered “True” to question 1 and “False”  
725 to question 2). The majority of participants answered both questions correctly (138 of 213 participants

726 [65%]), suggesting that most participants understood the task instructions. Nonetheless, these participants  
727 made up the dataset for all reported analyses for the online experiments, and all other online participants  
728 were excluded from analyses to exclude potential effects of explicit re-aiming.

729

730 *Data analysis.* Data were processed in Python 3.8.5 and Matlab 2018a. Trials with movement were  
731 excluded from analysis 1) if any of the reaches in the triplet were not straight (aspect ratio > participant-  
732 wise mean + 3 \* participant-wise standard deviation), 2) if the participant received any warning for failure  
733 to follow task instructions (see *Feedback for failure to follow task instructions*, above), or 3) if the triplet  
734 included a No-Movement No-Go perturbation trial with any detectable mouse movement (>0 pixels online,  
735 >5 mm in lab).

736         Reach endpoint angle was computed as the angular distance between the center of the target and  
737 the point at which the mouse passed the target's radial distance. Because mouse sampling rates did not  
738 always allow us to measure mouse position at the exact target radius during the online study, we used the  
739 last sample before and the first sample after the mouse passed the target radius to compute an interpolated  
740 mouse position at the target radius, as described in a previous report.<sup>48</sup> We note that analyses comparing  
741 these measures to measurements at the last sample of the reach (even when it was beyond the target) or  
742 the hand angle at peak velocity did not result in substantially different hand angle measurements or  
743 statistical outcomes.

744         Single-trial learning (STL) was measured as the difference between reach endpoint angle on the  
745 third and first trial of each triplet. For our initial analyses, the sign of STL corresponded to the direction of  
746 the relative change in hand angle, with clockwise changes in hand angle taking a negative sign and  
747 counterclockwise changes in hand angle taking a positive sign. When we collapsed STL data across  
748 rotation directions, we normalized the sign of STL so that changes in hand angle opposite the direction of  
749 the imposed rotation took a positive sign and changes in the direction of the rotation took a negative sign.

750         Remembered STL was quantified as the difference between reach endpoint angle on the first trial  
751 of one triplet and reach endpoint angle on the first trial of the previous triplet. When remembered STL is  
752 reported as a ratio, this value was computed by dividing remembered STL by the STL attributable to a given  
753 triplet.

754

755         *Statistics*. Statistical tests were conducted in R (v. 4.0.3; packages *rstatix*(61), *coin*(62), *MuMIn*(63),  
756 *lmerTest*(64), *lme4*(65), *r2glmm*(66), *emmeans*(67), *effsize*(68), *effectsize*(69), *magrittr*(70), *ggplot2*(71),  
757 *ggpubr*(72), *ggeffects*(73)). The reproducible code and data are available at  
758 <https://www.github.com/kimoli/LearningFromThePathNotTaken>. Data from in-lab experiments were  
759 analyzed using a two-way repeated measures ANOVA. If an ANOVA showed a significant main effect or  
760 interaction, post-hoc pairwise tests were performed. When samples failed to satisfy the normality  
761 assumption of the pairwise t-test (assessed via a Shapiro-Wilk test), we used the more robust paired-  
762 samples Wilcoxon signed-rank test. Otherwise, we used the more powerful paired t-test. Effect sizes for  
763 ANOVA main effects/interactions were quantified via generalized  $\eta^2$  ( $\eta_c^2$ ), we quantified the effect sizes for  
764 t-tests using Cohen's d, and we used the Wilcoxon effect size (r) to quantify effect sizes for signed-rank  
765 tests. For these and all subsequent analyses, we corrected for multiple comparisons using the false-  
766 discovery rate approach to maintain family-wise alpha at 0.05.

767         Data from the experiments conducted online did not satisfy multiple assumptions of the two-way  
768 repeated measures ANOVA (non-existence of extreme outliers, sphericity), so we employed a linear mixed  
769 modeling (LMM; R package *lmerTest* and *lme4*) approach for analysis of these data. All LMM's included  
770 fixed effects of perturbation size and movement condition, as well as random effects of subject. Degrees of  
771 freedom were estimated using the Kenward-Rogers approach, and LMM outcomes were reported using  
772 ANOVA-style statistics. Partial  $R^2$  was computed to report effect sizes for the LMM factors (R package  
773 *r2glmm*). Post-hoc pairwise comparisons were performed between estimated marginal means computed  
774 from the LMM (R package *emmeans*).

775         For one-off comparisons between samples or to distributions with 0-mean, we checked samples  
776 for normality. When samples were normally distributed, we ran t-tests and computed Cohen's d to report  
777 effect sizes for statistically significant results. Otherwise, we ran Wilcoxon-signed rank tests and measured  
778 effect sizes using the Wilcoxon effect size (r).

779

780 **FIGURE LEGENDS**

781 **Figure 1. Schematics showing the proposed learning framework and task design.** (a) Schematic  
782 showing how the forward model may support implicit motor adaptation in the presence of sensory feedback  
783 not causally related to self-generated movement. (b) Events on trials with visual feedback. The robotic  
784 apparatus brought the participant's hand to the starting location to initiate a trial. On Movement trials (top),  
785 the target turned green (GO), cueing participants to reach through the target. On trials with visual feedback,  
786 participants observed a white feedback cursor move along a rotated trajectory (Rotation). On No-Movement  
787 trials (bottom), the target turned magenta 100 ms after turning green, cueing participants to withhold  
788 movement (STOP). After a delay, an animation showing the feedback cursor moving 15° off-target played  
789 (Animation). The hand is shown in the figure for illustrative purposes but was not visible during the  
790 experiment. (c) How single-trial learning (STL) was computed using a triplet paradigm. Triplets were  
791 composed of 2 Movement trials without visual feedback flanking either a Movement or a No-Movement trial  
792 with visual feedback. STL was measured as the difference between reach angles on the flanking trials. (d)  
793 The pseudorandomized order in which trials were presented for an example participant. Color indicates  
794 movement condition (Movement: green, No-Movement: magenta).

795

796 **Figure 2. Effects of typical and simulated errors during a visuomotor reach adaptation task.** (a)  
797 Schematic illustrating how STL and remembered STL measurements were computed. (b) An example  
798 subject's (top) and the group's (bottom) mean  $\pm$  SEM changes in reach paths across triplets with a rotation  
799 applied (green: triplets with perturbations on Movement trials, magenta: triplets with perturbations on No-  
800 Movement trials, solid lines: perturbation was a CW rotation, dashed lines: perturbation was a CCW  
801 rotation). (c) STL across Movement (green) and No-Movement (magenta) triplets for all participants ( $n =$   
802 20). Positive changes in hand angle are CCW. Refer to Supplemental Table 1 for details on all statistical  
803 tests. (d) Group mean  $\pm$  SEM  $\Delta$ hand angle values after exposure to Movement (green) and No-Movement  
804 (magenta) trial perturbations. Positive  $\Delta$  values indicate that the change in hand angle proceeded opposite  
805 the direction of the perturbation (*i.e.*, the direction that would counter the error, "Right-Way"). (e) Group  
806 mean of participants' ratios of remembered STL to initial STL during Movement and No-Movement trials.  
807 (f) The relationship between Right-Way STL observed during Movement and No-Movement triplets. (g) As

808 in (f), but for STL observed on trials where adaptation proceeded in the direction that would exacerbate the  
809 error (*i.e.*, the same direction as the perturbation applied, “Wrong Way”). Statistical significance ( $* = p_{adj} <$   
810  $0.05$ ; n.s. =  $p_{adj} \geq 0.05$ ) is indicated. Abbreviations: STL – single-trial learning, CW – clockwise, CCW –  
811 counterclockwise,  $\Delta$  – change in.

812

813 **Figure 3. Effects of simulated errors when perturbations were never applied during Movement trials.**

814 (a) Schematic illustrating the relationship between movement and visual feedback on Movement trials  
815 during an experiment where visuomotor rotations (left) or error-clamps (right) were never applied during  
816 Movement trials. (b) An example participant’s mean  $\pm$  SEM changes in reach paths across No-Movement  
817 triplets from studies in which non-zero rotations (left) and error-clamps (right) were never applied (solid  
818 lines: perturbation was CW, dashed lines: perturbation was CCW). (c) Boxplots showing STL in response  
819 to different directions of simulated errors (No-Movement triplets indicated in magenta) from rotation (left,  $n$   
820 = 24) and error-clamp (right,  $n = 37$ ) studies. (d) Estimated marginal means  $\pm$  95% confidence intervals  
821 from the linear mixed models fit to each participant’s STL performance summarized in (c). Asterisks indicate  
822 statistically significant differences. (e) Mean  $\pm$  SEM relative hand angles on the two trials after a perturbation  
823 was presented on a No-Movement trial. Please refer to Supplemental Table 3 for detailed statistical results.  
824 Boxplot centers: median, notches: 95% confidence interval of the median, box edges: 1<sup>st</sup> and 3<sup>rd</sup> quartiles,  
825 whiskers: most extreme values within 1.5\*IQR of the median. Statistical significance ( $* = p_{adj} < 0.05$ ; n.s. =  
826  $p_{adj} \geq 0.05$ ) is indicated for selected comparisons. Abbreviations: STL – single-trial learning, CW –  
827 clockwise, CCW – counterclockwise,  $\Delta$  – change in.
